# Supplementary material for: Pyrolysis and gasification of 5–20 mm tyre rubber cubes under carbon dioxide flow
Source: Royal Society of Chemistry journal article supplement (doi:10.1039/d3re00577a), 2024-01-01
Supplement: d3re00577a1.pdf [file d3re00577a1.pdf]

## Jansen et al. (2024) Pyrolysis and gasification of ...

### Appendix A

#### *Justification for the use of Equation 4*

The transient local temperature in a solid may be computed by solution of Fourier II, i.e.,

$$C_p \rho \frac{\partial T}{\partial t} = \kappa \nabla^2 T - \sum S_i \quad (\text{A.1})$$

The S values are heat sources or sinks. For pyrolysis, when we use a single endothermic enthalpy sink and in 1D, A.1 becomes

$$\frac{dT}{dt} = \frac{\kappa}{C_p \rho} \frac{d^2 T}{dx^2} - \frac{\Delta H_{rxn}^\circ}{C_p} \frac{d\alpha}{dt} = \alpha_T \frac{d^2 T}{dx^2} - \frac{\Delta H_{rxn}^\circ}{C_p} f(\alpha) k(T) \quad (\text{A.2})$$

Using the fact that if, for any given control volume the reaction is complete, then  $f(\alpha) = 1$ , along with the rough approximations

$$\frac{d^2 T}{dx^2} \approx \frac{2\delta T}{(\delta x)^2} \quad \text{and} \quad \frac{dT}{dt} \approx \frac{\delta T}{\delta t} \quad (\text{A.3})$$

one may make the substitution

$$\frac{\delta T}{\delta t} \approx \alpha_T \frac{2\delta T}{(\delta x)^2} - \delta T k(T) \quad (\text{A.4})$$

Cancelling the  $\delta T$ s, and using  $\tau = \delta t$  as the characteristic time for the full reaction, and  $L_c = \delta x$  as the characteristic length – typically the radius for a spherical object – one has

$$\frac{1}{\tau} \approx \frac{2\alpha_T}{L_c^2} - k(T) \quad (\text{A.5})$$

Multiplying through by the denominators and rearranging, one arrives at

$$\tau \approx \frac{L_c^2}{2\alpha_T} + \frac{L_c^2}{2\alpha_T} \tau k(T) \quad (\text{A.6})$$

Using the approximation

$$L_c^2 \approx 2\alpha_T \tau \quad (\text{A.7})$$

for the second term on the RHS, one arrives at the quadratic

$$\tau \approx \frac{L_c^2}{2\alpha_T} + \tau^2 k(T) \quad \text{or} \quad \tau^2 k(T) - \tau + \frac{L_c^2}{2\alpha_T} \approx 0 \quad (\text{A.8})$$

Completing the square

$$\tau \approx \frac{1 \pm \sqrt{1 - 4k(T)\frac{L_c^2}{2\alpha_T}}}{2k(T)} \quad (\text{A.9})$$

For very small object sizes,  $L_c$  approximates zero, the second term in the discriminant becomes zero and, taking only the positive value for the square root as physical, the characteristic time for the reaction approximates

$$\tau_0 \approx \frac{2}{2k(T)} = \frac{1}{k(T)} \quad (\text{A.10})$$

I.e., the reaction time is independent of heat-transfer effects, and is simply the inverse of the inherent reaction constant. The subscript zero indicates negligible sample size. Substituting A.10 back into A.8, and using the subscript *pyrolysis* for the full process, one obtains

$$\tau_{pyrolysis} = \frac{L_c^2}{2\alpha_T} + \tau_0^2 k(T) = \frac{L_c^2}{2\alpha_T} + \tau_0 \frac{k(T)}{k(T)} = \tau_0 + \frac{L_c^2}{2\alpha_T} \quad (\text{A.11})$$

or more simply

$$\tau_{pyrolysis} = \tau_0 + \tau_{HT} \quad (\text{A.12})$$

splitting the pyrolysis time into the sum an intrinsic kinetic and a heat-transfer component.
